# Supplementary material for: Earthquake risk communication as dialogue – insights from a workshop in Istanbul's urban renewal neighbourhoods
Source: Copernicus journal article supplement (doi:10.5194/nhess-16-1157-2016), 2016-05-23
Supplement: Supplementary file 1 [file nhess-16-1157-2016-supplement.zip]

Archive with 2 entries (2 files):
- nhess-16-1157-2016-supplement-title-page.pdf
- Video Abstract_Earthquake Risk Communication as Dialogue.m4v
