# Supplementary material for: Earthquake risk communication as dialogue – insights from a workshop in Istanbul's urban renewal neighbourhoods
Source: Copernicus journal article supplement (doi:10.5194/nhess-16-1157-2016), 2016-05-23
Supplement: Supplementary file 1 [file nhess-16-1157-2016-supplement.zip › nhess-16-1157-2016-supplement-title-page.pdf]

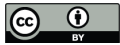

## *Supplement of*

# **Earthquake risk communication as dialogue – insights from a workshop in Istanbul’s urban renewal neighbourhoods**

**Johanna Ickert and Iain S. Stewart**

*Correspondence to:* Johanna Ickert ([johanna.ickert@plymouth.ac.uk](mailto:johanna.ickert@plymouth.ac.uk))

- [nhess-16-1157-2016-supplement-title-page.pdf](#)
- [Video Abstract\\_Earthquake Risk Communication as Dialogue.m4v](#)

The copyright of individual parts of the supplement might differ from the CC-BY 3.0 licence.
